# Supplementary material
Source: PubMed Central journal article supplement (PMC4026020)
Supplement: NIHMS571488-supplement-Supp_Method_S1.pdf [file NIHMS571488-supplement-Supp_Method_S1.pdf]

## Supporting Information Methods

### Data analysis for EMSA results

The intensities of each band on the gels were quantified by using Quantity One software (Bio-Rad Laboratory, Hercules, CA). The binding curves were created by plotting the fraction of RNA bound with proteins,  $\theta$  (total bound RNA in all bands divided by the sum of bound and unbound RNAs) as a function of protein concentration. The binding constants  $K_d$  can be calculated by fitting the data with the Hill equation:

$$\theta = \frac{(P_0 - nR_0\theta)^n}{K_d^n + (P_0 - nR_0\theta)^n}$$

where  $R_0$  is the total concentration of RNA added in each lane (3 nM),  $P_0$  is

the total concentration of proteins added in each lane, and  $n$  is the Hill coefficient.
