# Supplementary material
Source: PubMed Central journal article supplement (PMC4026020)
Supplement: NIHMS571488-supplement-Supp_Table_S1-S2.pdf [file NIHMS571488-supplement-Supp_Table_S1-S2.pdf]

## Supporting Information Tables

**Supplemental Table 1.** Primers used for molecular cloning.

| Primer                            | Sequence (5' to 3')                                                                 |
|-----------------------------------|-------------------------------------------------------------------------------------|
| AtTZF1 (At2g25900) FP             | CGGGATCCATGATGATCGGCGAAAATAAAA                                                      |
| AtTZF1 (At2g25900) RP             | CGGAATTCTCAACCGAGTGAGTTCTCTC                                                        |
| AtTZF1 (At2g25900) RR domain FP   | CGAATTCATGTTCTCCTCCGACGAGTTTCGCATC                                                  |
| AtTZF1 (At2g25900) RR domain RP   | AAGCTTTCACTTTCTCGGATCACGTCG                                                         |
| AtTZF1 (At2g25900) TZF domain FP  | CGGAATTCATGTTTCATTACTCCGGCACCG                                                      |
| AtTZF1 (At2g25900) TZF domain RP  | CGCTGCAGTCAAGGTAATACACGTAAGTCT                                                      |
| AtC3H15 (At1g68200) TZF domain FP | CGGAATTCATGGGGATGACAAAGACAGAGCT                                                     |
| AtC3H15 (At1g68200) TZF domain RP | CGCTGCAGTCAAACGAGCTTCTCCTGCTCA                                                      |
| hTTP (P26651) TZF domain FP       | CGGAATTCATGTCGCGCTACAAGACTGAG                                                       |
| hTTP (P26651) TZF domain RP       | CGAAGCTTTCACGGGGCCGCCAGGTCT                                                         |
| GASA6 FP                          | CACCATGGCCAAACTCATAACTTC                                                            |
| ARE RP                            | T <sup>28</sup> AATAAATAAATAAATAAATAAATAAATAAATAA<br>TAATAAATAATTATGGACATTTTGGTCCAC |
| MutG RP                           | T <sup>28</sup> AACAAACAACAACAACAACAACAACAACAACA<br>CAACAACAATTATGGACATTTTGGTCCAC   |

**Supplemental Table 2.** Primers for quantitative RT-PCR analyses.

| <b>Primer</b>     | <b>Sequence (5'-3')</b>       |
|-------------------|-------------------------------|
| <b>GASA6 FP</b>   | <b>ACCAATGTGGAGGACAATGCAC</b> |
| <b>GASA6 RP</b>   | <b>GGAGGGACACAAAGGCATTAGC</b> |
| <b>mCherry FP</b> | <b>AGGACGGCGAGTTCATCTA</b>    |
| <b>mCherry RP</b> | <b>CCCATGGTCTTCTTCTGCATTA</b> |
| <b>PP2A FP</b>    | <b>TAACGTGGCCAAAATGATGC</b>   |
| <b>PP2A RP</b>    | <b>GTTCTCCACAACCGCTTGGT</b>   |
